# Supplementary material for: Additive effects of variants of unknown significance in replication repair-associated DNA polymerase genes on mutational burden and prognosis across diverse cancers
Source: HighWire-hosted journal article supplement (doi:10.1136/jitc-2021-002336), 2021-09-01
Supplement: jitc-2021-002336supp001_data_supplement.xlsx [file jitc-2021-002336supp001_data_supplement.xlsx]

## Sheet: Sheet1
online supplementary table S1. Prevalence of POL alterations across diverse cancers.
Cancer type	Total patients No.	Patients with POL alterations No. (%)		Patients with POLE alterations No. (%)		Patients with POLD1 alterations No. (%)		Patients with POLH alterations No. (%)
		Somatic	Germline	Somatic	Germline	Somatic	Germline	Somatic	Germline
Endometrial	103	12 (11.7)	2 (1.9)	6 (5.8)	0	8 (7.8)	0	2 (1.9)	2 (1.9)
Urinary	110	9 (8.2)	1 (0.9)	6 (5.5)	1 (0.9)	7 (6.4)	0	1 (0.9)	0
Prostate	73	5 (6.8)	0	4 (5.5)	0	3 (4.1)	0	1 (1.4)	0
Colorectal	2411	154 (6.4)	24 (1.0)	116 (4.8)	16 (0.7)	73 (3.0)	6 (0.2)	23 (1.0)	3 (0.1)
Gastric	1162	66 (5.7)	8 (0.7)	41 (3.5)	4 (0.3)	20 (1.7)	4 (0.3)	12 (1.0)	1 (0.1)
Cervical	157	9 (5.7)	1 (0.6)	3 (1.9)	1 (0.6)	6 (3.8)	0	0	0
Esophageal	216	11 (5.1)	2 (0.9)	8 (3.7)	0	5 (2.3)	2 (0.9)	0	0
Head and neck	166	8 (4.8)	0	4 (2.4)	0	3 (1.8)	0	1 (0.6)	0
Kidney	136	6 (4.4)	1 (0.7)	3 (2.2)	0	3 (2.2)	1 (0.7)	0	0
Breast	864	29 (3.4)	4 (0.5)	16 (1.9)	2 (0.2)	13 (1.5)	2 (0.2)	2 (0.2)	0
Lung	4872	158 (3.2)	28 (0.6)	95 (1.9)	14 (0.3)	59 (1.2)	8 (0.2)	27 (0.6)	7 (0.1)
Hepatobiliary	774	22 (2.8)	5 (0.6)	9 (1.2)	3 (0.4)	11 (1.4)	1 (0.1)	4 (0.5)	1 (0.1)
Soft tissue sarcoma	334	8 (2.4)	2 (0.6)	1 (0.3)	1 (0.3)	5 (1.5)	0	2 (0.6)	1 (0.3)
Melanoma	181	4 (2.2)	1 (0.6)	3 (1.7)	0	2 (1.1)	1 (0.6)	1 (0.6)	0
Pancreatic	380	7 (1.8)	4 (1.1)	6 (1.6)	3 (0.8)	1 (0.3)	1 (0.3)	0	0
Ovarian	327	5 (1.5)	0	2 (0.6)	0	4 (1.2)	0	0	0
Total	12266	512 (4.2)	83 (0.7)	324 (2.6)	45 (0.4)	225 (1.8)	26 (0.2)	77 (0.6)	15 (0.1)

## Sheet: Sheet2
103	0.83972
110	0.896788
73	0.595141
2411	19.656
1162	9.47334
157	1.27996
216	1.76097
166	1.35333
136	1.10876
864	7.04386
4872	39.7195
774	6.31013
334	2.72297
181	1.47562
380	3.09799
327	2.66591
12266
