# Supplementary material for: Additive effects of variants of unknown significance in replication repair-associated DNA polymerase genes on mutational burden and prognosis across diverse cancers
Source: HighWire-hosted journal article supplement (doi:10.1136/jitc-2021-002336), 2021-09-01
Supplement: jitc-2021-002336supp002_data_supplement.xlsx [file jitc-2021-002336supp002_data_supplement.xlsx]

## Sheet: Sheet1
online supplemental table S2. Clinical and mutational characteristics of the four patients with more than one germline variants.
Patient ID	Sex	Age	Cancer	TMB	Germline variants	gnomAD_exome_ALL
P79	M	64	Gastric cancer	11.74	POLH, c.40A>G(p.M14V)	0.0002
					POLH, c.104C>T(p.A35V)	0.0003
					POLE, c.241G>A(p.A81T)	2e-05
P90	M	62	Pancreatic cancer	1.3	POLE, c.6716C>T(p.A2239V)	5e-05
					POLE, c.547G>A(p.A183T)	8e-06
P325	M	47	Colorectal cancer	144.74	POLE, c.1007A>G(p.N336S)	0.002
					POLD1, c.371T>C(p.V124A)	0.0002
P383	M	70	Lung cancer	9.13	POLD1, c.1027C>T(p.R343C)	2e-05
					POLE, c.4541T>C(p.V1514A)	0.0002
