# Supplementary material for: Additive effects of variants of unknown significance in replication repair-associated DNA polymerase genes on mutational burden and prognosis across diverse cancers
Source: HighWire-hosted journal article supplement (doi:10.1136/jitc-2021-002336), 2021-09-01
Supplement: jitc-2021-002336supp003_data_supplement.xlsx [file jitc-2021-002336supp003_data_supplement.xlsx]

## Sheet: Sheet1
online supplemental table S3. Previously reported POLD1 driver mutations
Protein change	Cancer type	MS status	TMB
E245K	Prostate	MSS	2.6
	Lung	MSS	7.8
	Colorectal	MSI	71.7
R311C	Head and Neck	MSS	9.1
D316N	Lung	MSS	18.7
R409W	Pancreatic	MSS	3.9
R689W	Colorectal	MSI	48.3
	Colorectal	MSI	127.8
