# Supplementary material for: Additive effects of variants of unknown significance in replication repair-associated DNA polymerase genes on mutational burden and prognosis across diverse cancers
Source: HighWire-hosted journal article supplement (doi:10.1136/jitc-2021-002336), 2021-09-01
Supplement: jitc-2021-002336supp004_data_supplement.xlsx [file jitc-2021-002336supp004_data_supplement.xlsx]

## Sheet: Sheet1
online supplemental table S4. Permutation analysis of mutation rates in DDR pathway genes in POLE drivers.
DDR gene	non-DDR genes with similar size (±5% bp*)	No. (%) of non-DDR genes with significantly lower mutation rate (permutation p value<0.05) than corresponding DDR gene
PALB2	EPAS1, PMS2, CBL, NBN, RECQL4, EPHA2, FGFR4, IKBKE, DDR2, XPC, BCL2, NF2, PRKCI, BTK	4/14 (29%)
ARID2	MAP3K1, ABCB1, c11orf30, JAK2, BRD4, ERBB3, EWSR1, SF3B1	5/8 (63%)
ATR	FGFR2, FAT1	1/2 (50%)
BRIP1	PTCH1, PIK3CA, INPP4B, KIT, FLT3, DENND1A, JAK3, BUB1B, PDGFRB, DNMT3A, PIK3C3, TSC1, TET2	4/13 (31%)
ATRX	NOTCH2, MED12	2/2 (100%)
ATM	NF1, KMT2A	0/2 (0%)
BRCA1	LRP1B*	1/1 (100%)
BRCA2	EGFR, FGFR1, TMPRSS2	3/3 (100%)
MSH6	PIK3R1, EPAS1, PMS2, CBL, FGFR3, RECQL4, EPHA2, FGFR4, IKBKE, EXT2, DDR2, XPC, BCL2, PRKCI, NF2, BTK	14/16 (88%)
MLH3	GRIN2A, LZTR1, CYLD, CSF1R, MRE11A, CDH1, NBN, EPHA3, ASXL1, STAT3, GNAS, AXL, HGF, EZH2, RRM1	9/15 (60%)
* LRP1B (38368bp) was used as a comparator for BRCA1 (41461bp)
