# Supplementary material for: Additive effects of variants of unknown significance in replication repair-associated DNA polymerase genes on mutational burden and prognosis across diverse cancers
Source: HighWire-hosted journal article supplement (doi:10.1136/jitc-2021-002336), 2021-09-01
Supplement: jitc-2021-002336supp005_data_supplement.xlsx [file jitc-2021-002336supp005_data_supplement.xlsx]

## Sheet: Sheet1
online supplemental table S5. Permutation analysis of the enrichment of DDR pathway genes in POLE drivers.
Comparison	No. of all mutated genes	No. (%) of genes enriched in POLE drivers (FDR adjusted p value <0.05)	P{X≥r} *
POLE driver vs. MSI_TMB-H	305	116 (38.0%)	0.00006 (r=10)
POLE driver vs. MSI_TMB-ultraH	300	48 (16.0%)	<0.00001 (r=9); 0.00001 (r=8)
* Probability of having no less than r genes with p-value <0.05 when randomly selecting 10 genes
