# Supplementary material for: Additive effects of variants of unknown significance in replication repair-associated DNA polymerase genes on mutational burden and prognosis across diverse cancers
Source: HighWire-hosted journal article supplement (doi:10.1136/jitc-2021-002336), 2021-09-01
Supplement: jitc-2021-002336supp006_data_supplement.xlsx [file jitc-2021-002336supp006_data_supplement.xlsx]

## Sheet: Sheet1
online supplemental table S6. Multivariate analysis of the additive effects of polymerase gene variants on survival.
	No. POL genes affected overall			No. POL genes affected in non-driver samples
Multivariate COX regression	P value	HR	95% CI	P value	HR	95%CI
~No. POL genes+cancer type (n=352)	0.068	0.64	0.38-1.03	0.17	0.67	0.38-1.19
~No. POL genes+cancer type+TMB_status (n=148)	0.14	0.48	0.18-1.29	0.16	0.38	0.10-1.47
