# Supplementary material for: Additive effects of variants of unknown significance in replication repair-associated DNA polymerase genes on mutational burden and prognosis across diverse cancers
Source: HighWire-hosted journal article supplement (doi:10.1136/jitc-2021-002336), 2021-09-01
Supplement: jitc-2021-002336supp007_data_supplement.xlsx [file jitc-2021-002336supp007_data_supplement.xlsx]

## Sheet: Sheet1
online supplemental table S7.Multivariate analysis of the survival associations of POL variants and DDR pathway alterations.
	POL_status			DDR_status			No. DDR gene mutated
Cox regression analysis	P value	HR	95% CI	P value	HR	95% CI	P value	HR	95% CI
~POL+DDR+Cancer type (n=4679)	P<0.0001	0.59	0.47-0.74	P=0.01	0.66	0.48-0.91	P<0.0001	0.52	0.42-0.63
~POL+DDR+Cancer type+High TMB (n=2768)	P=0.0004	0.51	0.36-0.74	P=0.01	0.57	0.36-0.89	P<0.0001	0.47	0.34-0.64
~POL+DDR+Cancer type+ultraHigh TMB (n=2768)	0=0.07	0.7	0.47-1.03	P=0.08	0.67	0.43-1.05	P<0.0001	0.56	0.41-0.77
